# Supplementary material for: Prolactin Levels Correlate with Abnormal B Cell Maturation in MRL and MRL/lpr Mouse Models of Systemic Lupus Erythematosus-Like Disease
Source: Hindawi journal article supplement (doi:10.1155/2013/287469), 2013-01-01

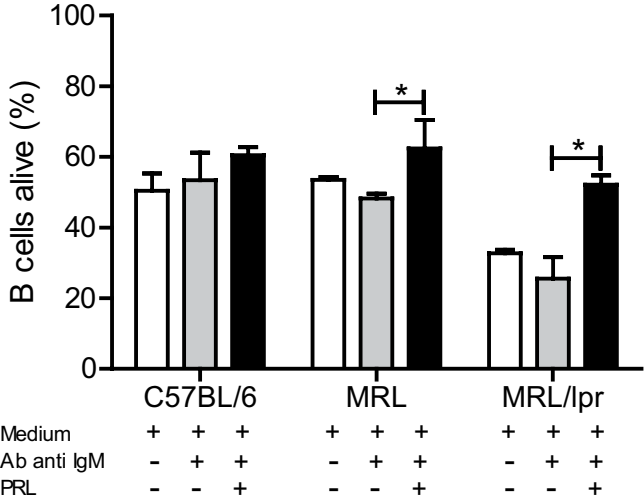

Supplement: f2 [file 287469.f2.pdf]
